# Supplementary material for: Genetic Architecture of Atherosclerosis in Mice: A Systems Genetics Analysis of Common Inbred Strains
Source: PubMed Central journal article supplement (PMC4687930; doi:10.1371/journal.pgen.1005711), 2015-12-22

A. Females

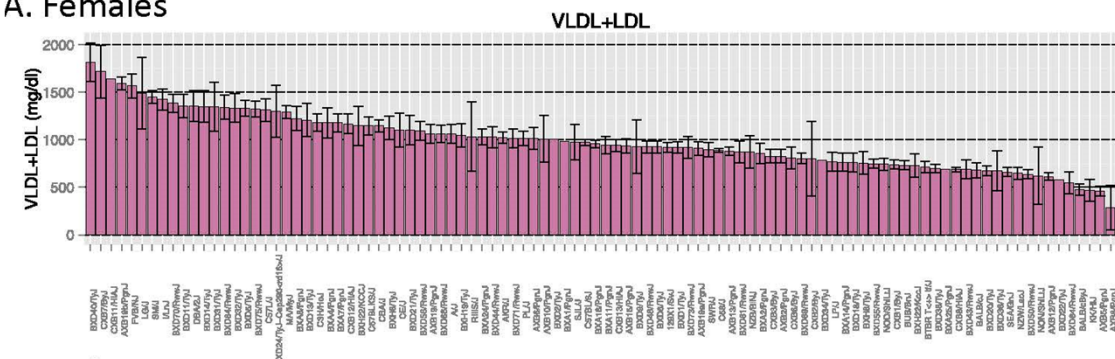

B. Males

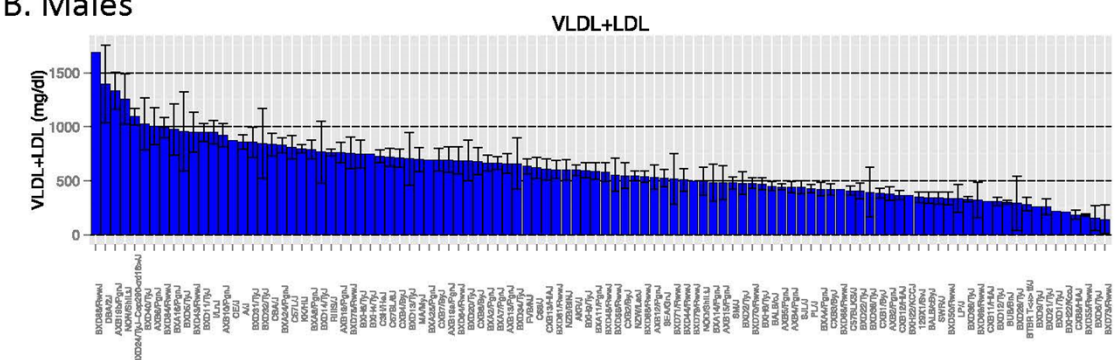

C. Females

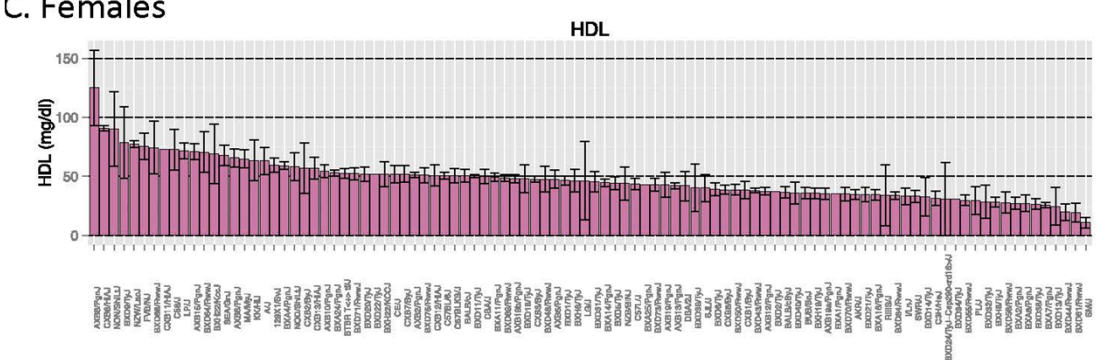

D. Males

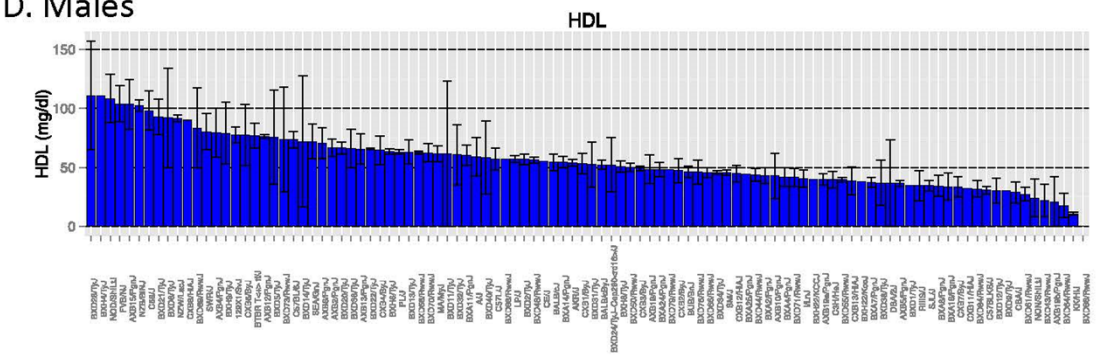

E. Females

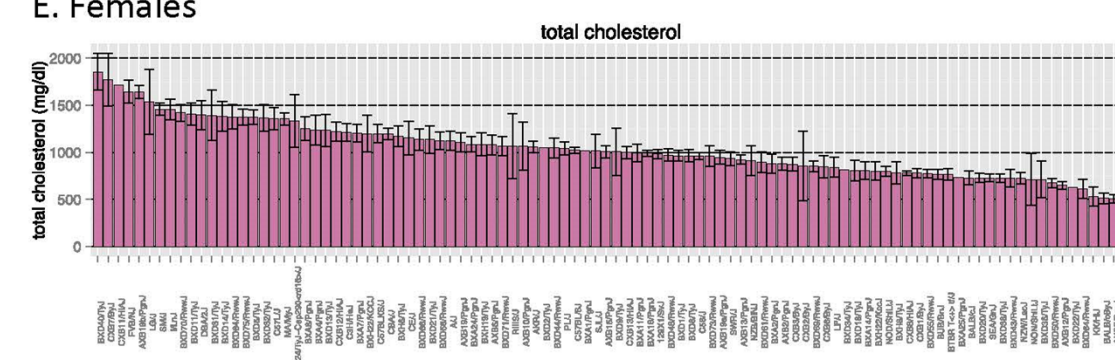

F. Males

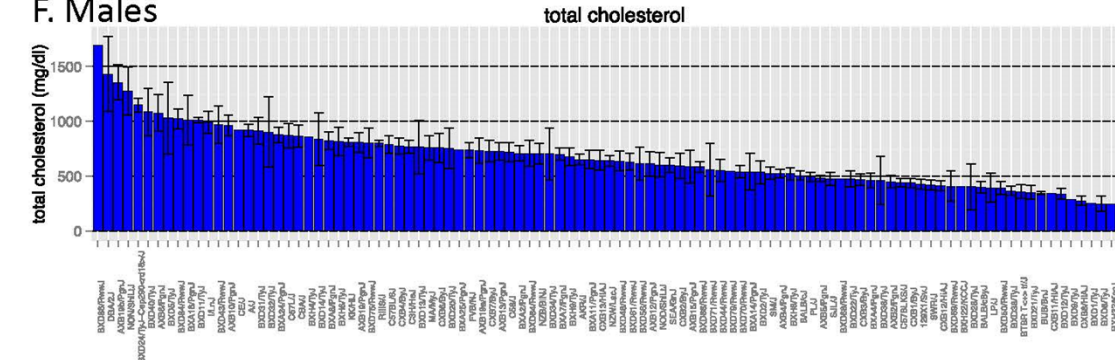

G. Females

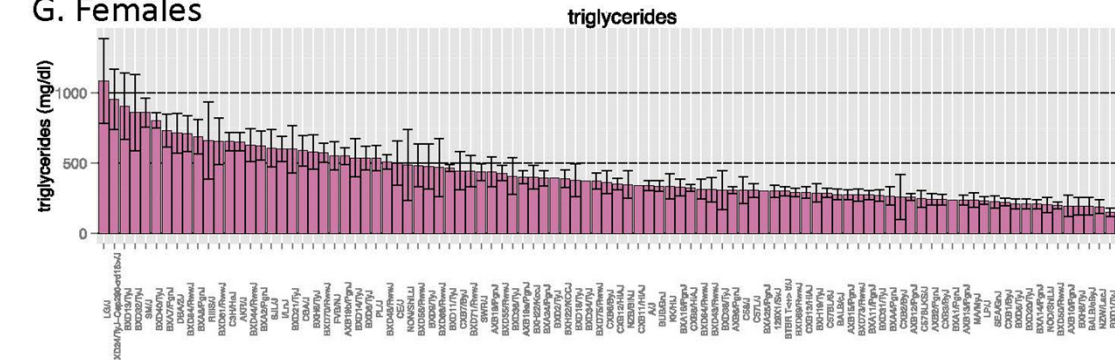

H. Males

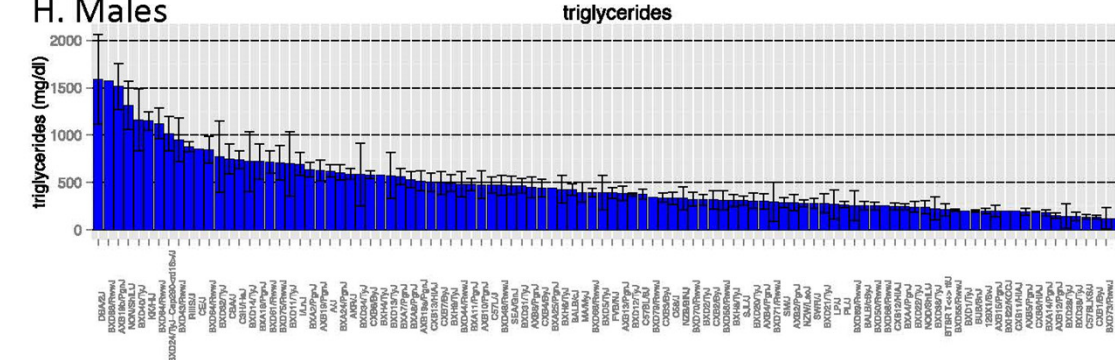

Supplement: pgen.1005711.s001.pdf [file pgen.1005711.s001.pdf]
