# Supplementary material for: Genetic Architecture of Atherosclerosis in Mice: A Systems Genetics Analysis of Common Inbred Strains
Source: PubMed Central journal article supplement (PMC4687930; doi:10.1371/journal.pgen.1005711), 2015-12-22

## Female CHR2 Locus Conditional Analysis

### Top Plot: Chr2 Mapping

Middle Plot: Conditioned on rs27381267

Bottom Plot: Conditioned on rs32754652

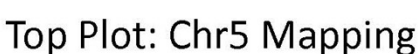

Bottom Plot: Conditioned on rs32008039

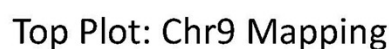

Bottom Plot: Conditioned on rs33738357

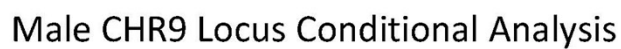

### Female CHR9 Locus Conditional Analysis

## Top Plot: Chr9 Mapping

Bottom Plot: Conditioned on rs33738357

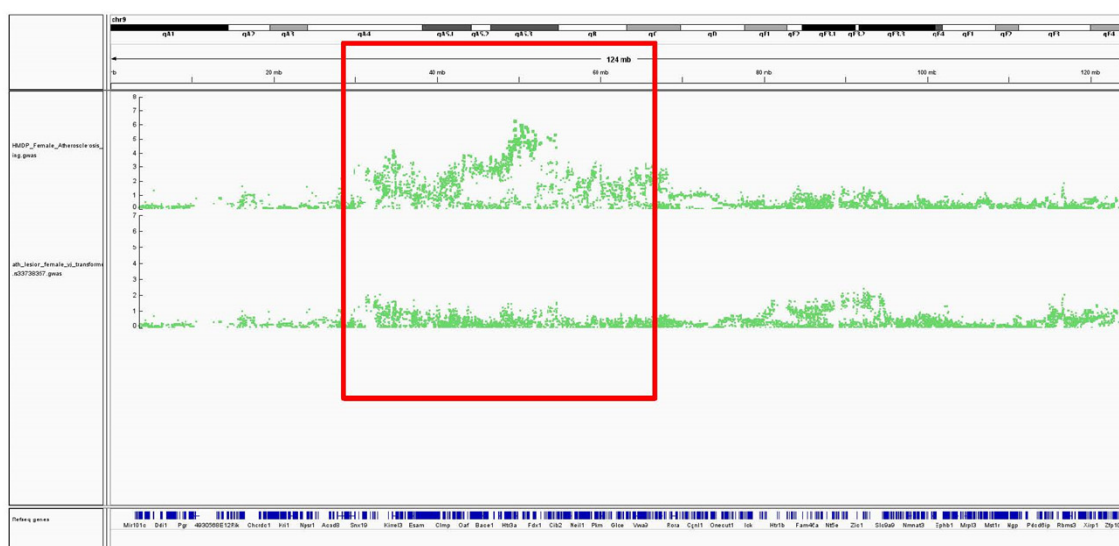

Supplement: pgen.1005711.s006.pdf [file pgen.1005711.s006.pdf]
