# Supplementary material for: Genetic Architecture of Atherosclerosis in Mice: A Systems Genetics Analysis of Common Inbred Strains
Source: PubMed Central journal article supplement (PMC4687930; doi:10.1371/journal.pgen.1005711), 2015-12-22

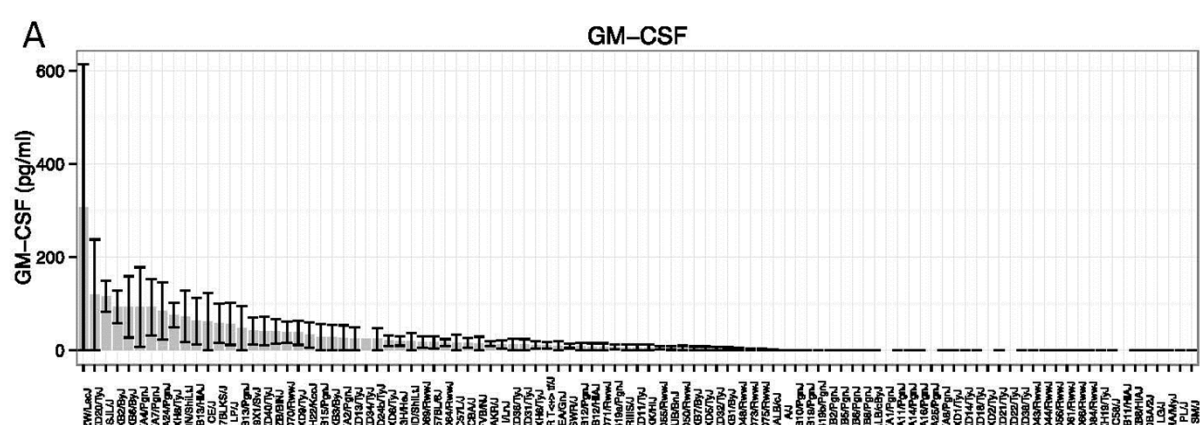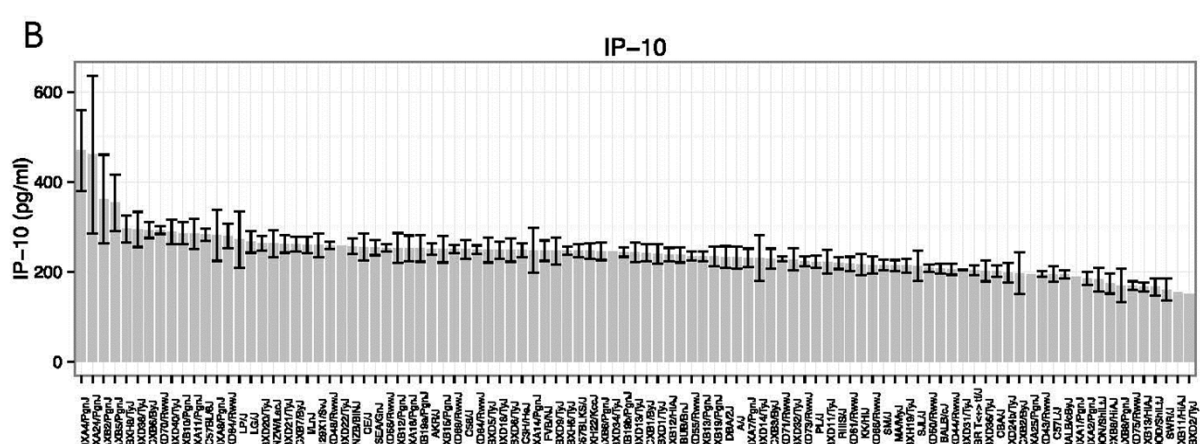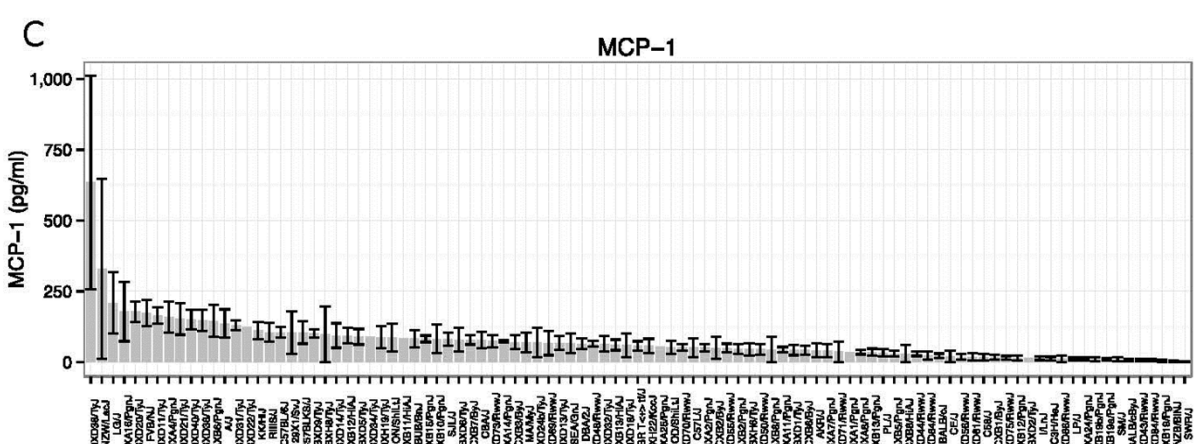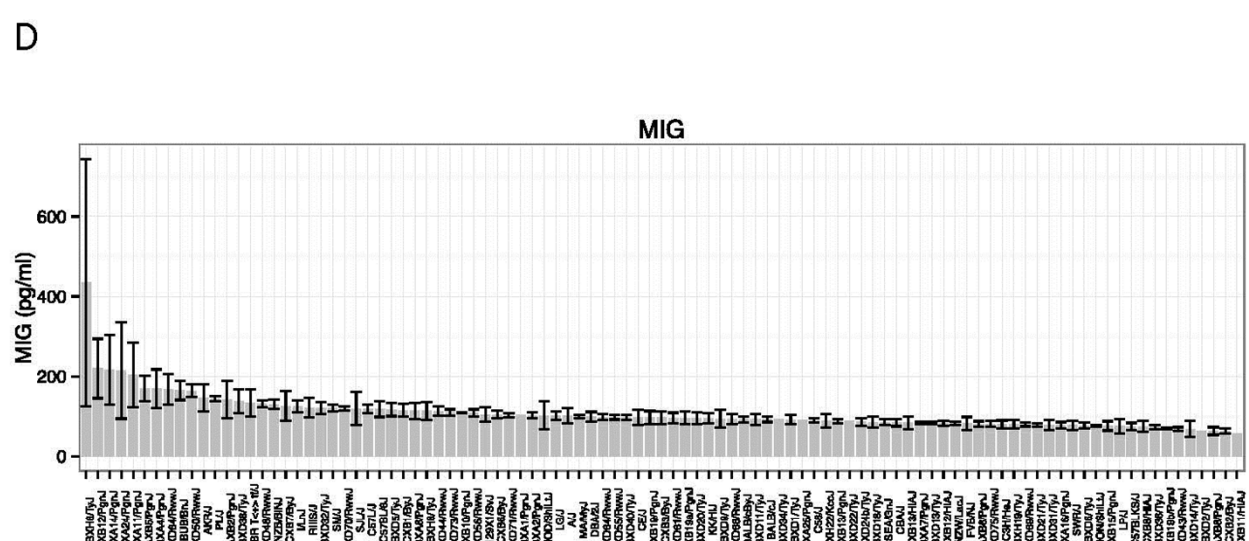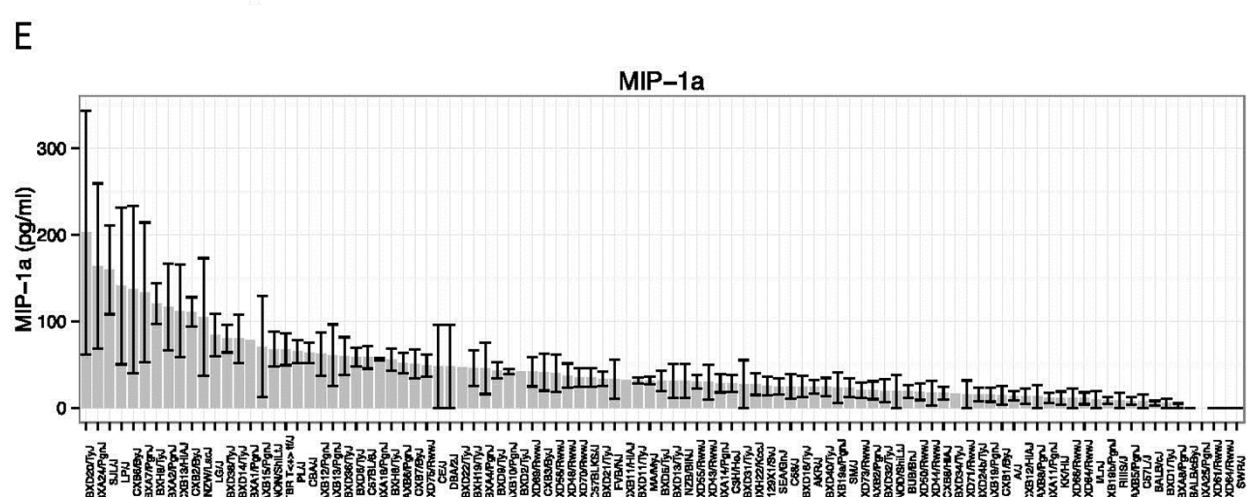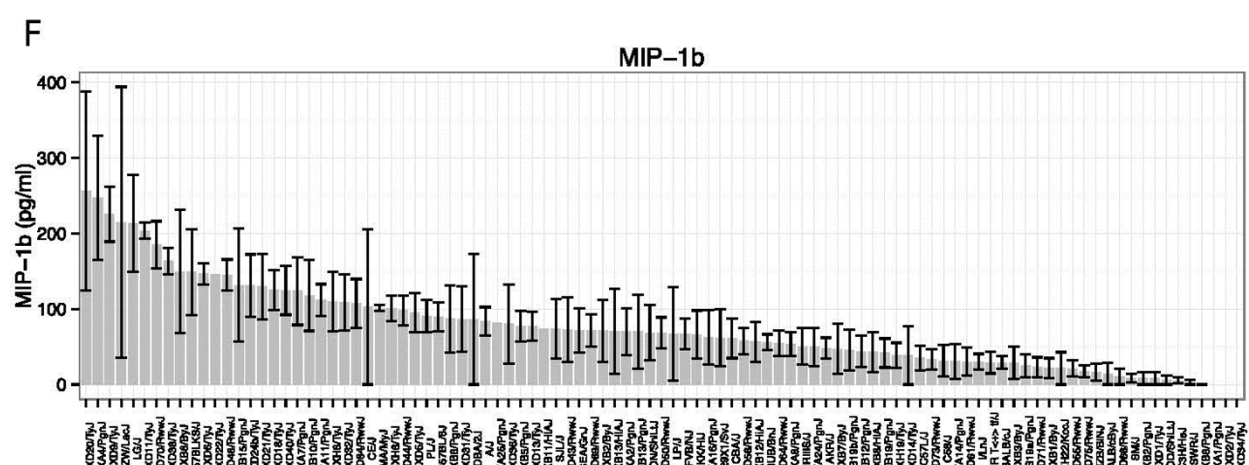

Supplement: pgen.1005711.s008.pdf [file pgen.1005711.s008.pdf]
