# Supplementary material for: Genetic Architecture of Atherosclerosis in Mice: A Systems Genetics Analysis of Common Inbred Strains
Source: PLoS Genet. 2015 Dec 22;11(12):e1005711. doi: 10.1371/journal.pgen.1005711 (PMC4687930; doi:10.1371/journal.pgen.1005711)
Supplement: S5 Table — (XLSX) [file pgen.1005711.s017.xlsx]

## Sheet: S5 Table
S5 Table: Cytokines Quantitated	Full Name
G-CSF	Granulocyte colony-stimulating factor
GM-CSF	Granulocyte macrophage colony-stimulating factor
IFNr	Interferon production regulator
IL-1a	Interleukin-1 alpha
IL-1b	Interleukin-1 beta
IL-2	Interleukin 2
IL-4	Interleukin 4
IL-6	Interleukin 6
IL-7	Interleukin 7
IL-10	Interleukin 10
IL-12 (p40)	Interleukin 12, subunit beta
IL-12 (p70)	Interleukin 12, active heterodimer
IL-13	Interleukin 13
IL-15	Interleukin 15
IP-10	Interferon-inducible protein-10
KC	Keratinocyte chemoattractant
MCP-1	Monocyte chemoattractant protein-1
MIP-1a	Macrophage inflammatory protein-1-alpha
MIP-1b	Macrophage inflammatory protein-1-beta
M-CSF	Macrophage colony stimulating factor
MIP-2	Macrophage inflammatory protein-2
MIG	Monokine induced by gamma-Interferon
RANTES	Regulated upon activation normal T-cell expressed, and presumably secreted
TNFa	Tumor necrosis factor alpha
