# Supplementary material for: Genetic Architecture of Atherosclerosis in Mice: A Systems Genetics Analysis of Common Inbred Strains
Source: PLoS Genet. 2015 Dec 22;11(12):e1005711. doi: 10.1371/journal.pgen.1005711 (PMC4687930; doi:10.1371/journal.pgen.1005711)
Supplement: S7 Table — (XLSX) [file pgen.1005711.s019.xlsx]

## Sheet: S7 Table
S7 Table: Local eQTLs and their correlation with lesion size in the atherosclerosis loci
Locus	Tissue	SNP ID	SNP Chromosome	SNP BP (mm10)	pobesetID	Gene Symbol	P-Value	SNP Weight	Lesion Size Correlation	Lesion Size Correlation P-Value
2qF1	Liver	rs32754652	2	126566580	1424697_PM_at	Dtwd1	1.42848e-13	-0.11427	-0.0808983	0.43578
2qF1	Liver	rs32754652	2	126566580	1424046_PM_at	Bub1	0.0004624	-0.119346	-0.0197205	0.849556
5qA3	Liver	rs32008039	5	24634604	1452776_PM_a_at	Nub1	1.64604e-16	0.0961068	0.358234	0.000364577
5qA3	Liver	rs32008039	5	24634604	1422622_PM_at	Nos3	3.08476e-06	0.114189	0.25789	0.0116304
5qA3	Liver	rs32008039	5	24634604	1420535_PM_a_at	Nub1	2.96514e-05	0.0746603	0.240158	0.0190677
5qA3	Liver	rs32008039	5	24634604	1450674_PM_at	Cdk5	0.000248069	-0.042558	-0.207547	0.043574
5qA3	Liver	rs32008039	5	24634604	1423713_PM_at	Abcb8	0.000745607	-0.0849976	-0.0569708	0.583433
9qA5.3	Liver	rs33738357	9	49632394	1421221_PM_at	Bco2	1.32163e-09	0.215219	0.299756	0.00316577
9qA5.3	Liver	rs33738357	9	49632394	1432517_PM_a_at	Nnmt	1.27033e-08	0.278219	0.374036	0.000188558
9qA5.3	Liver	rs33738357	9	49632394	1449357_PM_at	2310030G06Rik	5.41817e-07	-0.0595487	-0.336312	0.000861657
9qA5.3	Liver	rs33738357	9	49632394	1418844_PM_at	Alg9	1.04636e-06	0.0460373	0.251518	0.0139441
9qA5.3	Liver	rs33738357	9	49632394	1417211_PM_a_at	1110032A03Rik	2.26787e-06	0.0896667	0.260511	0.0107809
5qA3	Aorta	rs32008039	5	24634604	1452776_PM_a_at	Nub1	1.36771e-15	0.0892407	0.268134	0.0209003
5qA3	Aorta	rs32008039	5	24634604	1416636_PM_at	Rheb	7.59322e-12	0.058457	0.086863	0.461794
5qA3	Aorta	rs32008039	5	24634604	1420535_PM_a_at	Nub1	0.000556674	0.0623459	0.123304	0.295264
9qA5.3	Aorta	rs33738357	9	49632394	1430420_PM_at	Alg9	1.7592e-13	0.24603	0.454218	4.80391e-05
9qA5.3	Aorta	rs33738357	9	49632394	1432517_PM_a_at	Nnmt	1.01002e-11	0.278276	0.357459	0.00176823
9qA5.3	Aorta	rs33738357	9	49632394	1421221_PM_at	Bco2	0.000160529	0.0542392	0.259594	0.0255139
9qA5.3	Aorta	rs33738357	9	49632394	1417211_PM_a_at	1110032A03Rik	0.000218005	0.0744459	0.387991	0.000636294
